# Supplementary material for: Complexation of triangular silver(i) or copper(i) nitropyrazolates with dibenzothiophenes having potential use in adsorptive desulfurization
Source: Royal Society of Chemistry journal article supplement (doi:10.1039/d0dt04037a), 2021-01-01
Supplement: d0dt04037a1.pdf [file d0dt04037a1.pdf]

## Electronic Supporting Information

### **Complexation of triangular silver(I) or copper(I) nitropyrazolates with dibenzothiophenes having potential use in adsorptive desulfurization**

Lin Yang<sup>a</sup>, Lihong Wang<sup>b</sup>, Xingpu Lv<sup>a</sup>, Jing-Huo Chen<sup>\*a</sup>, Yang Wang<sup>\*b</sup> and Guang

Yang<sup>a\*</sup>

*<sup>a</sup>Green Catalysis Center, and College of Chemistry, Zhengzhou University, Zhengzhou, Henan,  
450001, China*

*<sup>b</sup>School of Chemistry and Chemical Engineering, Yangzhou University, Yangzhou, Jiangsu  
225002, China*

*E-mail: yang@zzu.edu.cn; yangwang@yzu.edu.cn; jhchen@zzu.edu.cn*

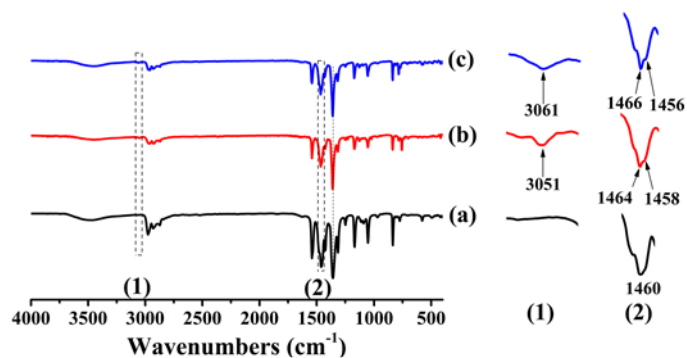

**Fig. S1** IR spectra (KBr pellet) of (a)  $\text{Ag}_3\text{pz}_3$ , (b)  $\text{Ag}_3\text{pz}_3\cdot\text{DBT}$ , (c)  $\text{Ag}_3\text{pz}_3\cdot\text{DMDBT}$ , (1) peaks at 3010-3090  $\text{cm}^{-1}$ , (2) peaks at 1430-1500  $\text{cm}^{-1}$ .

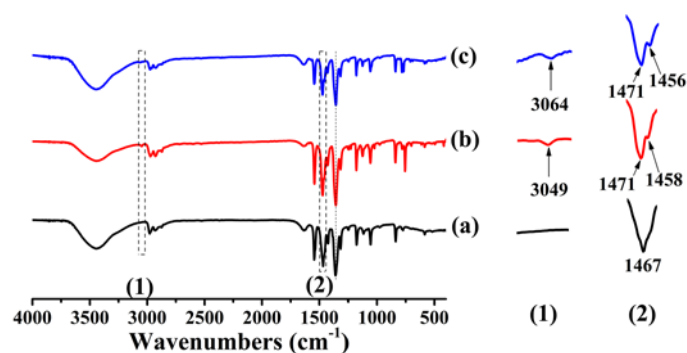

**Fig. S2** IR spectra (KBr pellet) of (a)  $\text{Cu}_3\text{pz}_3$ , (b)  $\text{Cu}_3\text{pz}_3\cdot\text{DBT}$ , (c)  $\text{Cu}_3\text{pz}_3\cdot\text{DMDBT}$ , (1) peaks at 3010-3100  $\text{cm}^{-1}$ , (2) peaks at 1440-1500  $\text{cm}^{-1}$ .

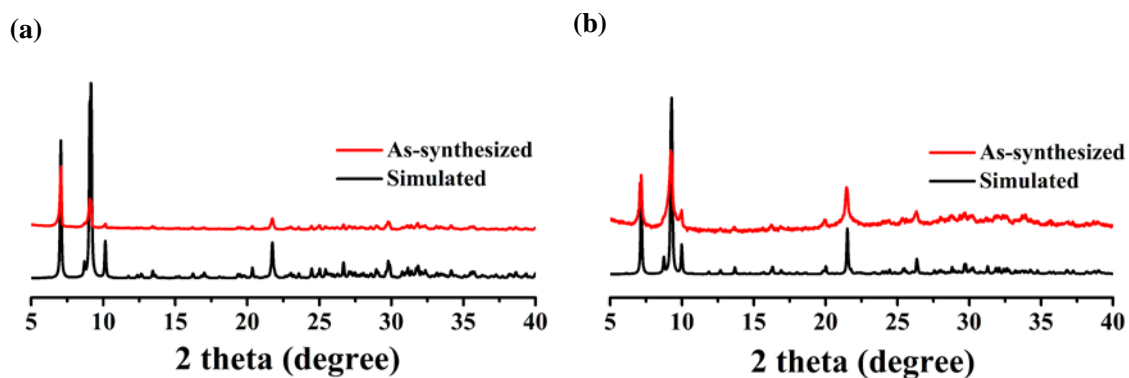

**Fig. S3** Comparison of the PXR D pattern of the as-synthesized sample of  $\text{Ag}_3\text{pz}_3$  (a) and  $\text{Cu}_3\text{pz}_3$  (b) (red line) with the simulated pattern based on the crystal data (black line).

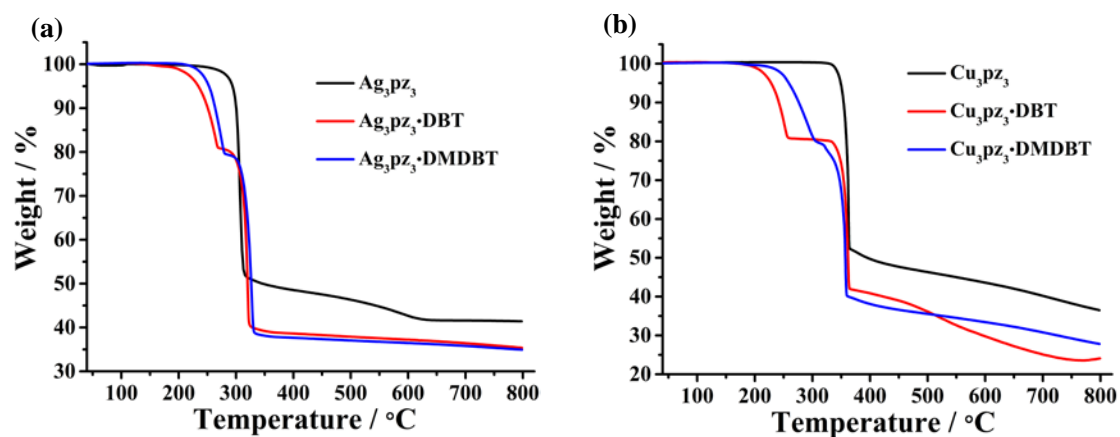

Fig. S4 Thermogravimetric curves of  $\text{Ag}_3\text{pz}_3$  (a),  $\text{Cu}_3\text{pz}_3$  (b) and their adducts with DBT/DMDBT.

Table S1. Thermogravimetric data of  $\text{Ag}_3\text{pz}_3$ ,  $\text{Cu}_3\text{pz}_3$  and their adducts

|                                             | Weight loss<br>(found) | Temperature (°C) | Weight loss (Calc.) | Assignment |
|---------------------------------------------|------------------------|------------------|---------------------|------------|
| $\text{Ag}_3\text{pz}_3 \cdot \text{DMDBT}$ | 20.5%                  | 141 – 281        | 20.1%               | –DMDBT     |
| $\text{Ag}_3\text{pz}_3 \cdot \text{DBT}$   | 19.0%                  | 130 – 270        | 18.2%               | –DBT       |
| $\text{Cu}_3\text{pz}_3 \cdot \text{DMDBT}$ | 21.0%                  | 141 – 309        | 23.2%               | –DMDBT     |
| $\text{Cu}_3\text{pz}_3 \cdot \text{DBT}$   | 19.3%                  | 132 – 260        | 20.8%               | –DBT       |

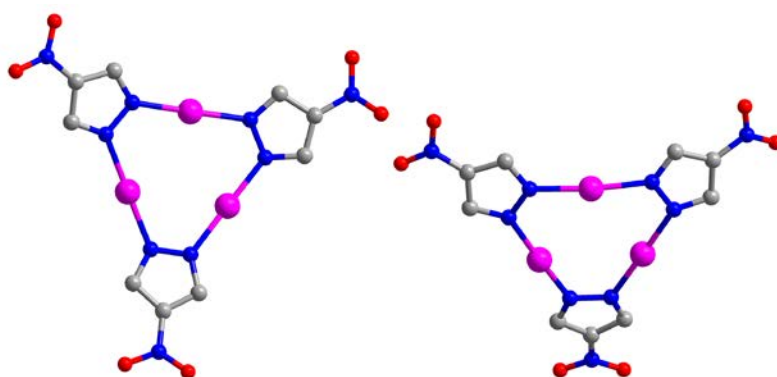

Fig. S5 The asymmetric unit of  $\text{Ag}_3\text{pz}_3$  showing two crystallographically independent molecules. Colour code: Ag, pink; N, blue; C, gray and O, red. The diethyl groups and hydrogen atoms of pyrazole have been omitted in this and the following figures for clarity.

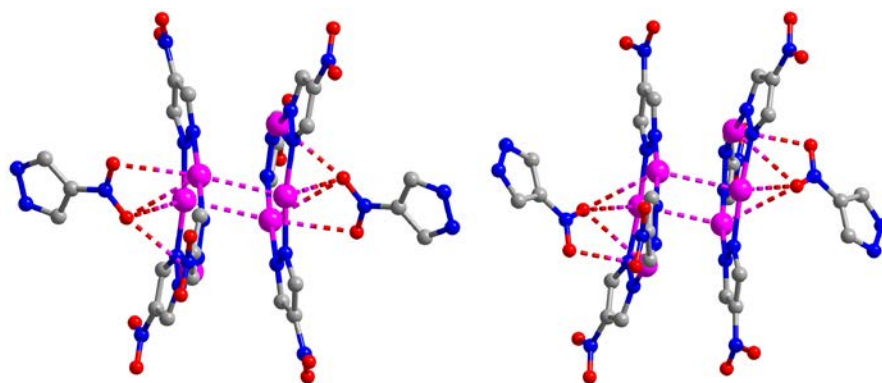

**Fig. S6** The dimer of trimers of  $\text{Ag}_3\text{pz}_3$ . Colour code: Ag, pink; N, blue; C, gray and O, red.

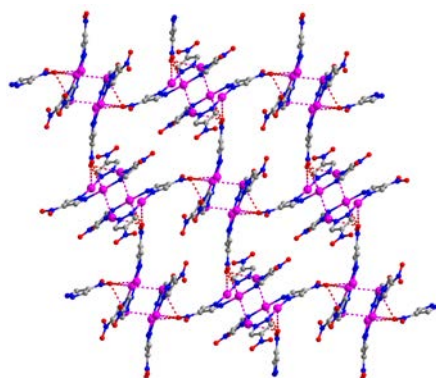

**Fig. S7** A fragment of the 2D net in the crystal structure of  $\text{Ag}_3\text{pz}_3$ . Colour code: Ag, pink; N, blue; C, gray and O, red.

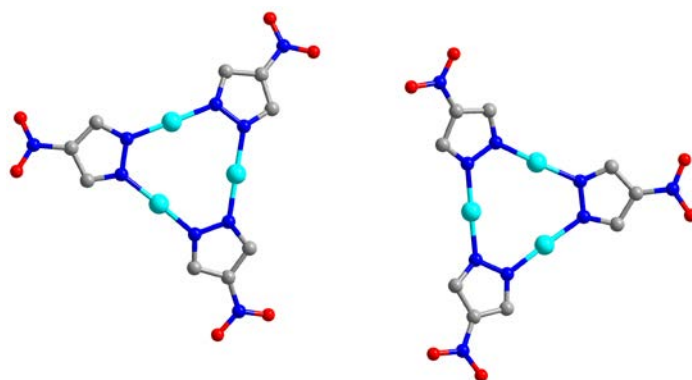

**Fig. S8** The asymmetric unit of  $\text{Cu}_3\text{pz}_3$  showing two crystallographically independent molecules. Colour code: Cu, turquoise; N, blue; C, gray and O, red.

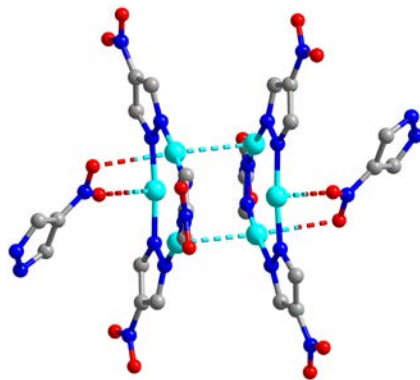

**Fig. S9** The dimer of trimers of  $\text{Cu}_3\text{pz}_3$ . Colour code: Cu, turquoise; N, blue; C, gray and O, red.

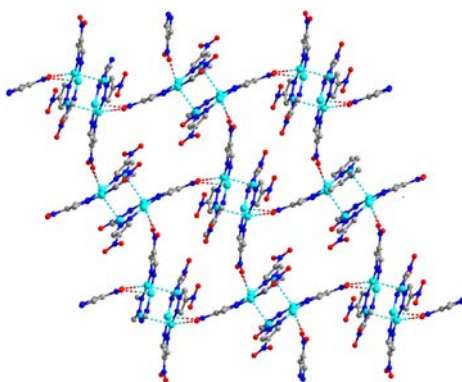

**Fig. S10** A fragment of the 2D net in the crystal structure of  $\text{Cu}_3\text{pz}_3$ . Colour code: Cu, turquoise; N, blue; C, gray and O, red.

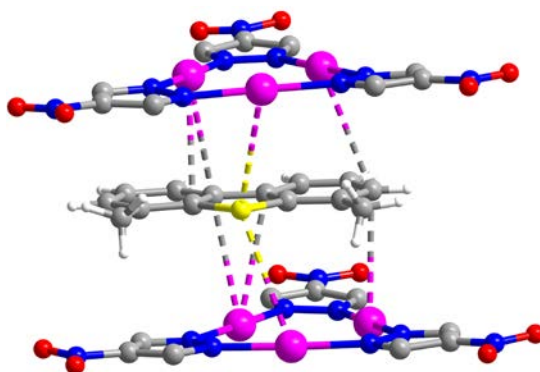

**Fig. S11** A fragment of the columnar stacking of  $\text{Ag}_3\text{pz}_3\cdot\text{DMDBT}$ , showing  $\text{Ag}\cdots\text{S}$  and  $\text{Ag}\cdots\text{C}$  contacts. Ag, pink; N, blue; C, gray; H, white; O, red and S, yellow. The diethyl group of pyrazole have been omitted in this and the following figures for clarity.

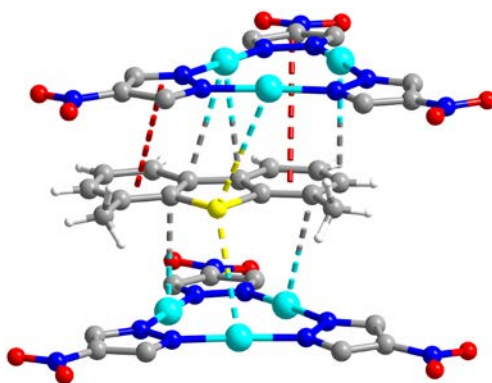

**Fig. S12** A fragment of the columnar stacking of  $\text{Cu}_3\text{pz}_3\cdot\text{DMDBT}$ , showing  $\text{Cu}\cdots\text{S}$ ,  $\text{Cu}\cdots\text{C}$  contacts and  $\pi\cdots\pi$  interactions. Colour code: Cu, turquoise; N, blue; C, gray; H, white; O, red and S, yellow.

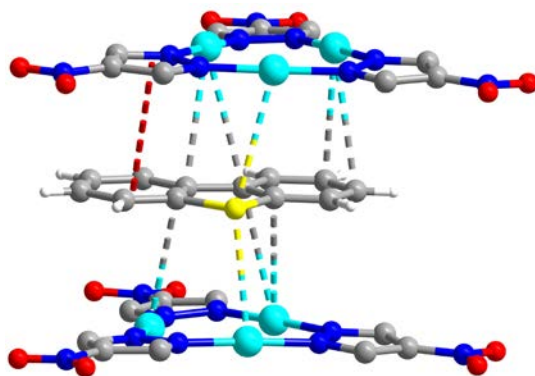

**Fig. S13** A fragment of the columnar stacking of  $\text{Cu}_3\text{pz}_3\cdot\text{DBT}$  showing  $\text{Cu}\cdots\text{S}$ ,  $\text{Cu}\cdots\text{C}$  contacts and  $\pi\cdots\pi$  stacking interactions. Colour code: Cu, turquoise; N, blue; C, gray; H, white; O, red and S, yellow.

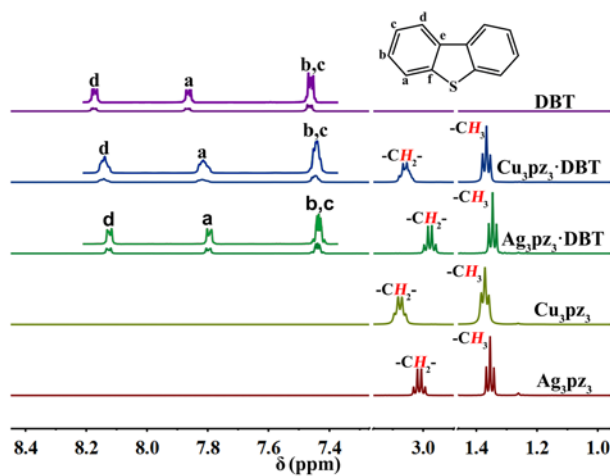

**Fig. S14** Stack plot of  $^1\text{H}$  NMR spectra for DBT,  $\text{Cu}_3\text{pz}_3\cdot\text{DBT}$ ,  $\text{Ag}_3\text{pz}_3\cdot\text{DBT}$ ,  $\text{Cu}_3\text{pz}_3$  and  $\text{Ag}_3\text{pz}_3$  in  $\text{CD}_2\text{Cl}_2$ .

**Table S2.** Comparison of  $^1\text{H}$  NMR of DBT,  $\text{Cu}_3\text{pz}_3\cdot\text{DBT}$ ,  $\text{Ag}_3\text{pz}_3\cdot\text{DBT}$ ,  $\text{Cu}_3\text{pz}_3$  and  $\text{Ag}_3\text{pz}_3$ 

| $^1\text{H}$ NMR/ppm                    | d         | a         | b,c      | $\text{CH}_2$ | $\text{CH}_3$ |
|-----------------------------------------|-----------|-----------|----------|---------------|---------------|
| DBT                                     | 8.19 (dd) | 7.89 (dd) | 7.48 (m) |               |               |
| $\text{Cu}_3\text{pz}_3$                |           |           |          | 3.08 (q)      | 1.37 (t)      |
| $\text{Cu}_3\text{pz}_3\cdot\text{DBT}$ | 8.14 (t)  | 7.82 (dd) | 7.45 (m) | 3.07 (q)      | 1.37 (t)      |
| $\Delta/\text{ppm}$                     | 0.05      | 0.07      | 0.03     | 0.01          | 0             |
| $\text{Ag}_3\text{pz}_3$                |           |           |          | 3.01 (q)      | 1.36 (t)      |
| $\text{Ag}_3\text{pz}_3\cdot\text{DBT}$ | 8.13 (dd) | 7.80 (dd) | 7.44 (m) | 2.98 (q)      | 1.35 (t)      |
| $\Delta/\text{ppm}$                     | 0.06      | 0.09      | 0.04     | 0.03          | 0.01          |

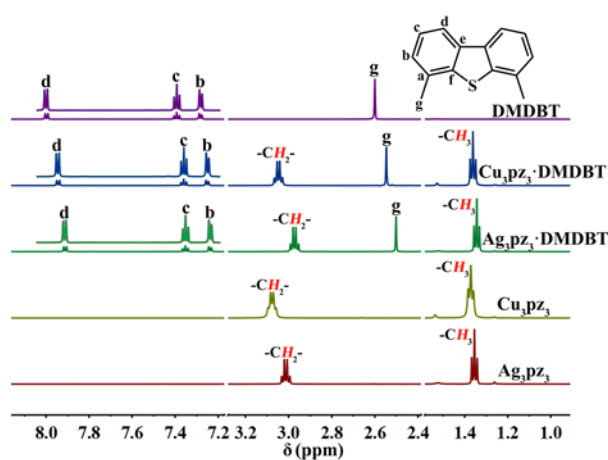**Fig. S15** Stack plot of  $^1\text{H}$  NMR spectra for DMDBT,  $\text{Cu}_3\text{pz}_3\cdot\text{DMDBT}$ ,  $\text{Ag}_3\text{pz}_3\cdot\text{DMDBT}$ ,  $\text{Cu}_3\text{pz}_3$  and  $\text{Ag}_3\text{pz}_3$  in  $\text{CD}_2\text{Cl}_2$ .**Table S3.** Comparison of  $^1\text{H}$  NMR of DMDBT,  $\text{Cu}_3\text{pz}_3\cdot\text{DMDBT}$ ,  $\text{Ag}_3\text{pz}_3\cdot\text{DMDBT}$ ,  $\text{Cu}_3\text{pz}_3$  and  $\text{Ag}_3\text{pz}_3$ 

|                                           | d        | c        | b        | g        | $\text{CH}_2$ | $\text{CH}_3$ |
|-------------------------------------------|----------|----------|----------|----------|---------------|---------------|
| DMDBT                                     | 8.02 (d) | 7.41 (t) | 7.30 (d) | 2.62 (s) |               |               |
| $\text{Cu}_3\text{pz}_3$                  |          |          |          |          | 3.08 (q)      | 1.37 (t)      |
| $\text{Cu}_3\text{pz}_3\cdot\text{DMDBT}$ | 7.95 (d) | 7.37 (t) | 7.26 (d) | 2.55 (s) | 3.05 (q)      | 1.37 (t)      |
| $\Delta/\text{ppm}$                       | 0.07     | 0.04     | 0.04     | 0.07     | 0.03          | 0             |
| $\text{Ag}_3\text{pz}_3$                  |          |          |          |          | 3.01 (q)      | 1.36 (t)      |
| $\text{Ag}_3\text{pz}_3\cdot\text{DMDBT}$ | 7.92 (d) | 7.36 (t) | 7.24 (d) | 2.51 (s) | 2.98 (q)      | 1.35 (t)      |
| $\Delta/\text{ppm}$                       | 0.1      | 0.05     | 0.06     | 0.11     | 0.03          | 0.01          |

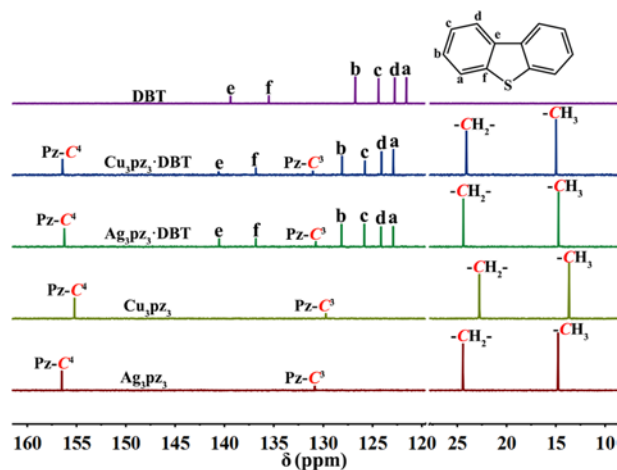

**Fig. S16** Stack plot of  $^{13}\text{C}$  NMR spectra for DBT,  $\text{Cu}_3\text{pz}_3\cdot\text{DBT}$ ,  $\text{Ag}_3\text{pz}_3\cdot\text{DBT}$ ,  $\text{Cu}_3\text{pz}_3$  and  $\text{Ag}_3\text{pz}_3$  in  $\text{CD}_2\text{Cl}_2$ .

**Table S4.** Comparison of  $^{13}\text{C}$  NMR of DBT,  $\text{Cu}_3\text{pz}_3\cdot\text{DBT}$ ,  $\text{Ag}_3\text{pz}_3\cdot\text{DBT}$ ,  $\text{Cu}_3\text{pz}_3$  and  $\text{Ag}_3\text{pz}_3$ .

| $^{13}\text{C}$ NMR/ppm                 | e      | f      | b      | c      | d      | a      | pz- $\text{C}^3$ | pz- $\text{C}^4$ | $\text{CH}_2$ | $\text{CH}_3$ |
|-----------------------------------------|--------|--------|--------|--------|--------|--------|------------------|------------------|---------------|---------------|
| DBT                                     | 139.81 | 135.92 | 127.18 | 124.83 | 123.18 | 122.00 |                  |                  |               |               |
| $\text{Cu}_3\text{pz}_3$                |        |        |        |        |        |        | 130.17           | 155.64           | 23.19         | 14.09         |
| $\text{Cu}_3\text{pz}_3\cdot\text{DBT}$ | 139.71 | 135.91 | 127.21 | 124.87 | 123.19 | 121.99 | 130.14           | 155.52           | 23.17         | 14.08         |
| $\Delta/\text{ppm}$                     | 0.1    | 0.01   | -0.03  | -0.04  | -0.01  | 0.01   | 0.03             | 0.12             | 0.02          | 0.01          |
| $\text{Ag}_3\text{pz}_3$                |        |        |        |        |        |        | 129.94           | 155.60           | 23.51         | 13.87         |
| $\text{Ag}_3\text{pz}_3\cdot\text{DBT}$ | 139.63 | 135.91 | 127.25 | 124.93 | 123.24 | 122.02 | 129.86           | 155.34           | 23.48         | 13.83         |
| $\Delta/\text{ppm}$                     | 0.18   | 0.01   | -0.07  | -0.1   | -0.06  | -0.02  | 0.08             | 0.26             | 0.03          | 0.04          |

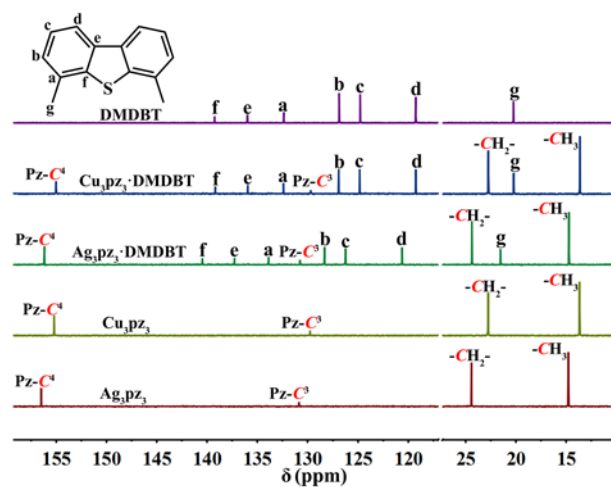

**Fig. S17** Stack plot of  $^{13}\text{C}$  NMR spectra for DMDBT,  $\text{Cu}_3\text{pz}_3\cdot\text{DMDBT}$ ,  $\text{Ag}_3\text{pz}_3\cdot\text{DMDBT}$ ,  $\text{Cu}_3\text{pz}_3$  and  $\text{Ag}_3\text{pz}_3$  in  $\text{CD}_2\text{Cl}_2$ .



**Table S5.** Comparison of  $^{13}\text{C}$  NMR of DMDBT,  $\text{Cu}_3\text{pz}_3$ -DMDBT,  $\text{Ag}_3\text{pz}_3$ -DMDBT,  $\text{Cu}_3\text{pz}_3$  and  $\text{Ag}_3\text{pz}_3$ .

| $^{13}\text{C}$ NMR/ppm         | f      | e      | a      | b      | c      | d      | g     | pz- $\text{C}^3$ | pz- $\text{C}^4$ | $\text{CH}_2$ | $\text{CH}_3$ |
|---------------------------------|--------|--------|--------|--------|--------|--------|-------|------------------|------------------|---------------|---------------|
| DMDBT                           | 139.67 | 136.40 | 132.78 | 127.32 | 125.22 | 119.69 | 20.67 |                  |                  |               |               |
| $\text{Cu}_3\text{pz}_3$        |        |        |        |        |        |        |       | 130.17           | 155.64           | 23.19         | 14.09         |
| $\text{Cu}_3\text{pz}_3$ -DMDBT | 139.60 | 136.37 | 132.82 | 127.36 | 125.27 | 119.69 | 20.65 | 130.11           | 155.45           | 23.17         | 14.06         |
| $\Delta$ /ppm                   | 0.07   | 0.03   | -0.04  | -0.04  | -0.05  | 0      | 0.02  | 0.06             | 0.19             | 0.02          | 0.03          |
| $\text{Ag}_3\text{pz}_3$        |        |        |        |        |        |        |       | 129.94           | 155.60           | 23.51         | 13.87         |
| $\text{Ag}_3\text{pz}_3$ -DMDBT | 139.56 | 136.36 | 132.97 | 127.44 | 125.35 | 119.72 | 20.63 | 129.84           | 155.27           | 23.47         | 13.82         |
| $\Delta$ /ppm                   | 0.11   | 0.04   | -0.19  | -0.12  | -0.13  | -0.03  | 0.04  | 0.1              | 0.33             | 0.04          | 0.05          |

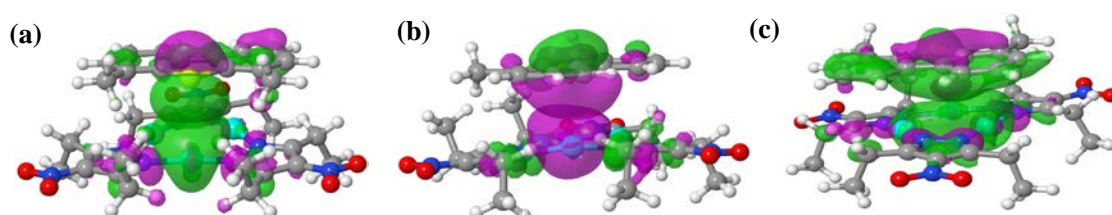

**Fig. S18** The three most important MBFO pairs for the interactions between  $\text{Ag}_3\text{pz}_3$  and DMBT. The bond order for the MBFO pair is 0.050, 0.019 and 0.015 in (a), (b) and (c), respectively. The orbitals are shown with an isovalue of 0.03.

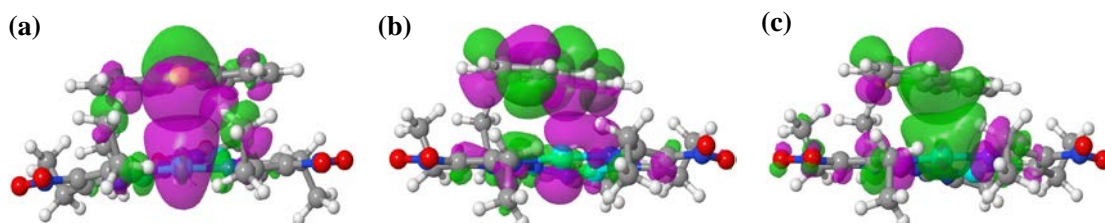

**Fig. S19** The three most important MBFO pairs for the interactions between  $\text{Cu}_3\text{pz}_3$  and DBT. The bond order for the MBFO pair is 0.029, 0.024 and 0.023 in (a), (b) and (c), respectively. The orbitals are shown with an isovalue of 0.03.

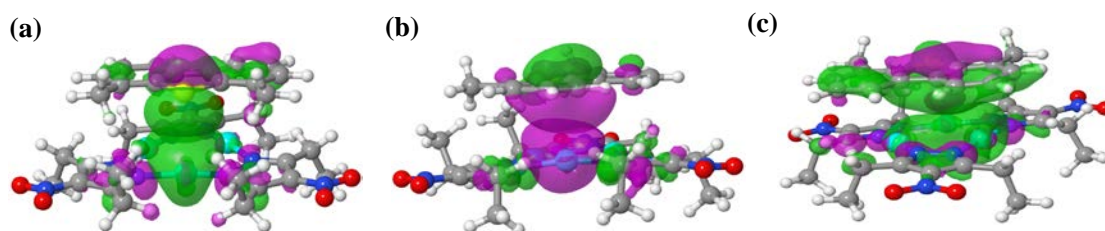

**Fig. S20** The three most important MBFO pairs for the interactions between  $\text{Cu}_3\text{pz}_3$  and DMBT. The bond order for the MBFO pair is 0.031, 0.017 and 0.014 in (a), (b) and (c), respectively. The orbitals are shown with an isovalue of 0.03.

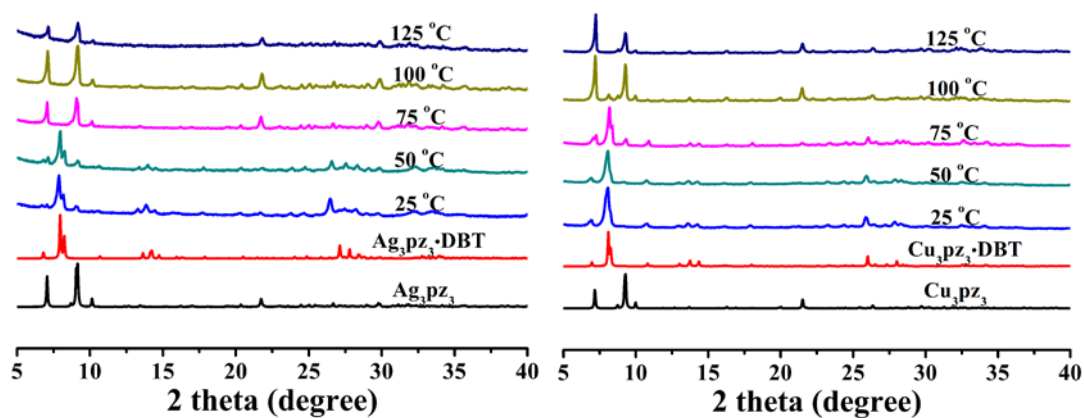

**Fig. S21** Comparison of the PXRD patterns of DBT-adsorbed samples of  $\text{Ag}_3\text{pz}_3/\text{Cu}_3\text{pz}_3$  at different temperatures with those simulated from their crystal data (red and black line). (Experimental condition: 0.02 mmol  $\text{M}_3\text{pz}_3$  in 10 mL of *n*-octane containing 1000 mg S/L of DBT with the molar ratio of S:  $\text{M}_3\text{pz}_3 = 15.6$ )

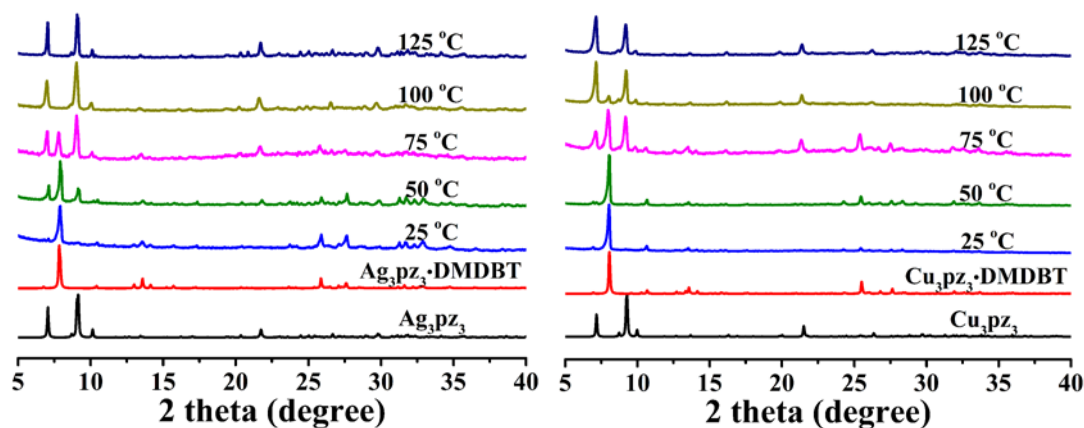

**Fig. S22** Comparison of the PXRD patterns of DMBDT-adsorbed samples of  $\text{Ag}_3\text{pz}_3/\text{Cu}_3\text{pz}_3$  at different temperatures with those simulated from their crystal data (red and black line). (Experimental condition: 0.02 mmol  $\text{M}_3\text{pz}_3$  in 10 mL of *n*-octane containing 800 mg S/L of DMBDT with the molar ratio of S:  $\text{M}_3\text{pz}_3 = 12.5$ )

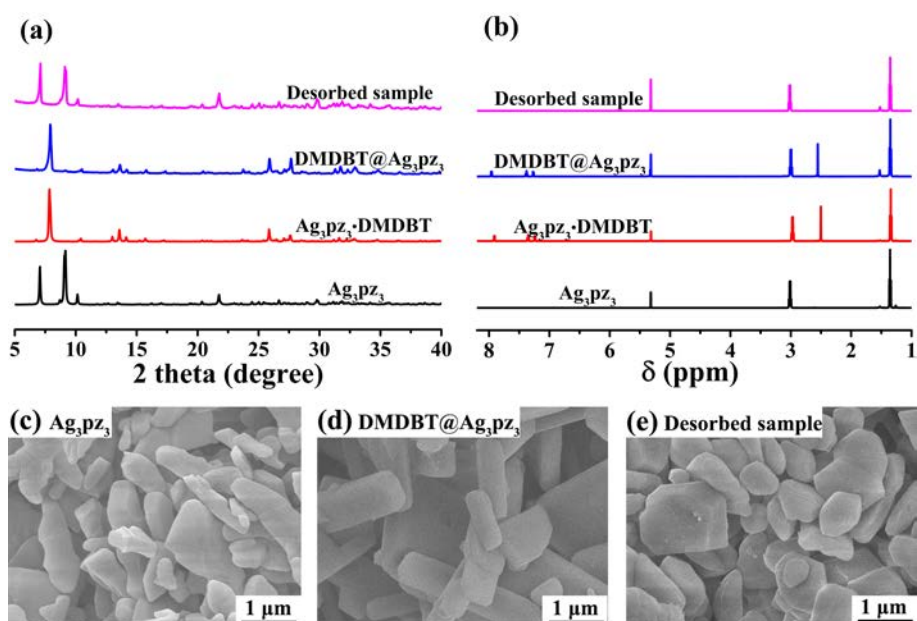

**Fig. S23** PXR patterns (a), <sup>1</sup>H NMR spectra (b) and SEM images (c,d,e) of the DMDBT-adsorbed and desorbed samples of Ag<sub>3</sub>pz<sub>3</sub> in comparison with those of Ag<sub>3</sub>pz<sub>3</sub> or Ag<sub>3</sub>pz<sub>3</sub>·DMDBT.

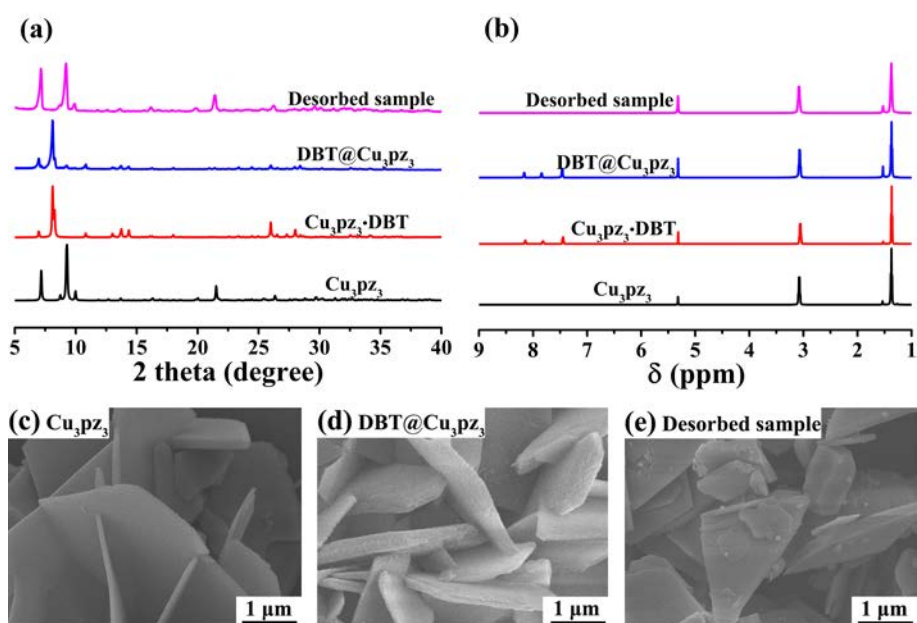

**Fig. S24** PXR patterns (a), <sup>1</sup>H NMR spectra (b) and SEM images (c,d,e) of the DBT-adsorbed and desorbed samples of Cu<sub>3</sub>pz<sub>3</sub> in comparison with those of Cu<sub>3</sub>pz<sub>3</sub> or Cu<sub>3</sub>pz<sub>3</sub>·DBT.

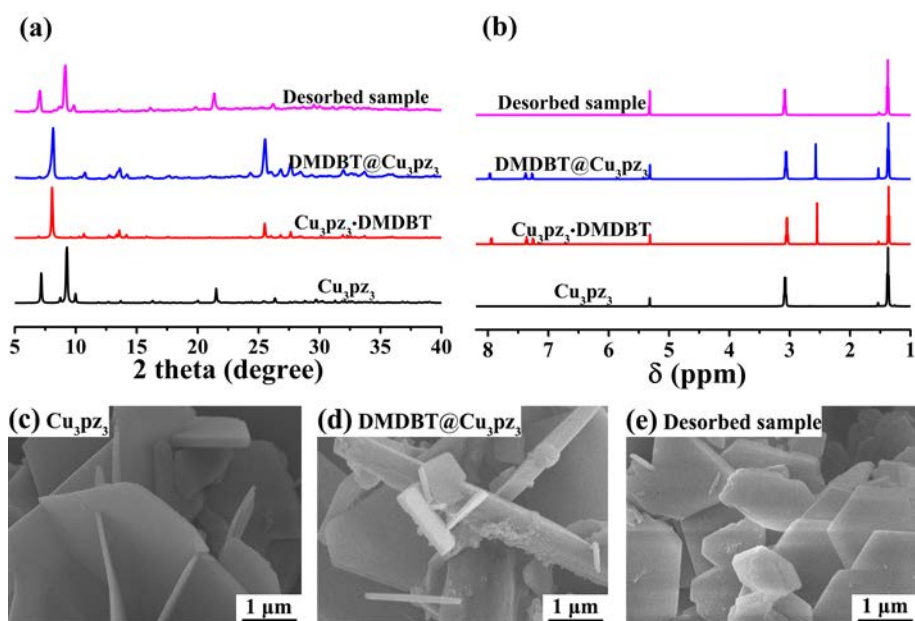

**Fig. S25** PXR patterns (a), <sup>1</sup>H NMR spectra (b) and SEM images (c,d,e) of the DMDBT-adsorbed and desorbed samples of Cu<sub>3</sub>pz<sub>3</sub> in comparison with those of Cu<sub>3</sub>pz<sub>3</sub> or Cu<sub>3</sub>pz<sub>3</sub>-DMDBT.

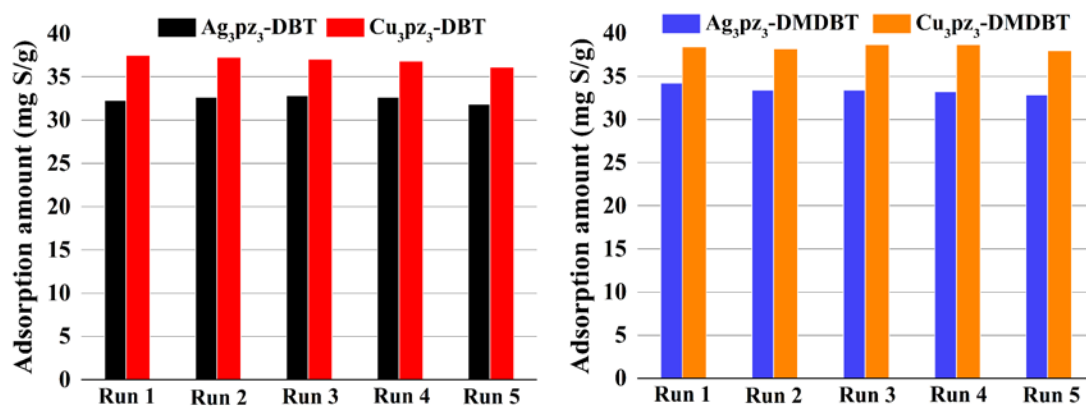

**Fig. S26** Recycling test of Ag<sub>3</sub>pz<sub>3</sub> (0.02 mmol) and Cu<sub>3</sub>pz<sub>3</sub> (0.02 mmol) for the adsorption of DBT and DMDBT from *n*-octane containing 1000 mg S/L of DBT or 800 mg S/L of DMDBT (10 mL).

**Table S6** Crystallographic data and structure refinements

|                                               | <b>Ag<sub>3</sub>pz<sub>3</sub></b>                                             | <b>Ag<sub>3</sub>pz<sub>3</sub>·DBT</b>                                         | <b>Ag<sub>3</sub>pz<sub>3</sub>·DMDBT</b>                                       | <b>(Ag<sub>3</sub>pz<sub>3</sub>)<sub>2</sub>·BT</b>                              |
|-----------------------------------------------|---------------------------------------------------------------------------------|---------------------------------------------------------------------------------|---------------------------------------------------------------------------------|-----------------------------------------------------------------------------------|
| Formula                                       | C <sub>42</sub> H <sub>60</sub> Ag <sub>6</sub> N <sub>18</sub> O <sub>12</sub> | C <sub>33</sub> H <sub>38</sub> Ag <sub>3</sub> N <sub>9</sub> O <sub>6</sub> S | C <sub>35</sub> H <sub>42</sub> Ag <sub>3</sub> N <sub>9</sub> O <sub>6</sub> S | C <sub>50</sub> H <sub>66</sub> Ag <sub>6</sub> N <sub>18</sub> O <sub>12</sub> S |
| Mol. wt.                                      | 1656.30                                                                         | 1012.39                                                                         | 1040.44                                                                         | 1790.48                                                                           |
| Crystal system                                | Monoclinic                                                                      | Monoclinic                                                                      | Monoclinic                                                                      | Monoclinic                                                                        |
| Space group                                   | <i>P2<sub>1</sub>/c</i>                                                         | <i>P2<sub>1</sub>/c</i>                                                         | <i>P2<sub>1</sub>/c</i>                                                         | <i>C2/c</i>                                                                       |
| <i>a</i> (Å)                                  | 25.0348(10)                                                                     | 13.1758(2)                                                                      | 13.2738(6)                                                                      | 19.2517(4)                                                                        |
| <i>b</i> (Å)                                  | 17.4283(7)                                                                      | 21.4602(4)                                                                      | 22.3282(7)                                                                      | 24.1571(5)                                                                        |
| <i>c</i> (Å)                                  | 13.2012(5)                                                                      | 13.1785(3)                                                                      | 13.8197(6)                                                                      | 14.3647(3)                                                                        |
| $\alpha$ (deg)                                |                                                                                 |                                                                                 |                                                                                 |                                                                                   |
| $\beta$ (deg)                                 | 91.0170(10)                                                                     | 100.0406(18)                                                                    | 100.078(4)                                                                      | 105.5782(8)                                                                       |
| $\gamma$ (deg)                                |                                                                                 |                                                                                 |                                                                                 |                                                                                   |
| <i>V</i> (Å <sup>3</sup> )                    | 5759.0(4)                                                                       | 3669.21(13)                                                                     | 4032.7(3)                                                                       | 6435.1(2)                                                                         |
| <i>Z</i>                                      | 4                                                                               | 4                                                                               | 4                                                                               | 4                                                                                 |
| <i>T</i> (K)                                  | 298.15(10)                                                                      | 120(10)                                                                         | 298.15(10)                                                                      | 298.15(10)                                                                        |
| $\rho_{\text{calcd.}}$ (Mg/m <sup>3</sup> )   | 1.910                                                                           | 1.833                                                                           | 1.714                                                                           | 1.848                                                                             |
| $\mu$ (mm <sup>-1</sup> )                     | 2.071                                                                           | 1.699                                                                           | 1.549                                                                           | 1.893                                                                             |
| Reflns collected                              | 73119                                                                           | 27145                                                                           | 28415                                                                           | 41721                                                                             |
| Reflns unique                                 | 10151                                                                           | 6466                                                                            | 7123                                                                            | 5677                                                                              |
|                                               | ( <i>R</i> <sub>int</sub> = 0.0723)                                             | ( <i>R</i> <sub>int</sub> = 0.0964)                                             | ( <i>R</i> <sub>int</sub> = 0.0532)                                             | ( <i>R</i> <sub>int</sub> = 0.0757)                                               |
| Final <i>R</i> indices                        | <i>R</i> <sub>1</sub> = 0.0404                                                  | <i>R</i> <sub>1</sub> = 0.0366                                                  | <i>R</i> <sub>1</sub> = 0.0626                                                  | <i>R</i> <sub>1</sub> = 0.0480                                                    |
|                                               | <i>wR</i> <sub>2</sub> = 0.0825                                                 | <i>wR</i> <sub>2</sub> = 0.0797                                                 | <i>wR</i> <sub>2</sub> = 0.1762                                                 | <i>wR</i> <sub>2</sub> = 0.1056                                                   |
| [ <i>I</i> > 2 $\sigma$ ( <i>I</i> )]         |                                                                                 |                                                                                 |                                                                                 |                                                                                   |
| <i>S</i>                                      | 1.026                                                                           | 1.030                                                                           | 1.067                                                                           | 1.062                                                                             |
| $\Delta\rho_{\text{max}}$ (eÅ <sup>-3</sup> ) | 1.20                                                                            | 1.10                                                                            | 0.79                                                                            | 0.69                                                                              |
| $\Delta\rho_{\text{min}}$ (eÅ <sup>-3</sup> ) | -0.88                                                                           | -1.35                                                                           | -0.93                                                                           | -0.66                                                                             |

**Table S7** Crystallographic data and structure refinements

|                                               | <b>Cu<sub>3</sub>pz<sub>3</sub></b>                                           | <b>Cu<sub>3</sub>pz<sub>3</sub>·DBT</b>                                         | <b>Cu<sub>3</sub>pz<sub>3</sub>·DMDBT</b>                                       |
|-----------------------------------------------|-------------------------------------------------------------------------------|---------------------------------------------------------------------------------|---------------------------------------------------------------------------------|
| Formula                                       | C <sub>21</sub> H <sub>30</sub> Cu <sub>3</sub> N <sub>9</sub> O <sub>6</sub> | C <sub>33</sub> H <sub>38</sub> Cu <sub>3</sub> N <sub>9</sub> O <sub>6</sub> S | C <sub>35</sub> H <sub>42</sub> Cu <sub>3</sub> N <sub>9</sub> O <sub>6</sub> S |
| Mol. wt.                                      | 695.16                                                                        | 879.40                                                                          | 907.45                                                                          |
| Crystal system                                | Monoclinic                                                                    | Monoclinic                                                                      | Monoclinic                                                                      |
| Space group                                   | <i>P2<sub>1</sub>/c</i>                                                       | <i>P2<sub>1</sub>/c</i>                                                         | <i>P2<sub>1</sub>/c</i>                                                         |
| <i>a</i> (Å)                                  | 24.6486(15)                                                                   | 12.8446(18)                                                                     | 12.8398(6)                                                                      |
| <i>b</i> (Å)                                  | 17.7157(10)                                                                   | 21.390(3)                                                                       | 21.8537(10)                                                                     |
| <i>c</i> (Å)                                  | 12.7565(7)                                                                    | 13.7791(19)                                                                     | 14.0702(6)                                                                      |
| $\alpha$ (deg)                                |                                                                               |                                                                                 |                                                                                 |
| $\beta$ (deg)                                 | 90.671(2)                                                                     | 99.202(4)                                                                       | 98.4970(10)                                                                     |
| $\gamma$ (deg)                                |                                                                               |                                                                                 |                                                                                 |
| <i>V</i> (Å <sup>3</sup> )                    | 5570.0(6)                                                                     | 3737.0(9)                                                                       | 3904.7(3)                                                                       |
| <i>Z</i>                                      | 8                                                                             | 4                                                                               | 4                                                                               |
| <i>T</i> (K)                                  | 298.15(10)                                                                    | 298.15(10)                                                                      | 298.15(10)                                                                      |
| $\rho_{\text{calcd.}}$ (Mg/m <sup>3</sup> )   | 1.658                                                                         | 1.563                                                                           | 1.544                                                                           |
| $\mu$ (mm <sup>-1</sup> )                     | 2.323                                                                         | 1.803                                                                           | 1.728                                                                           |
| Reflns collected                              | 69497                                                                         | 45165                                                                           | 61638                                                                           |
| Reflns unique                                 | 9813                                                                          | 6597                                                                            | 6899                                                                            |
|                                               | ( <i>R</i> <sub>int</sub> = 0.0426)                                           | ( <i>R</i> <sub>int</sub> = 0.0466)                                             | ( <i>R</i> <sub>int</sub> = 0.0352)                                             |
| Final <i>R</i> indices                        | <i>R</i> <sub>1</sub> = 0.0519                                                | <i>R</i> <sub>1</sub> = 0.0500                                                  | <i>R</i> <sub>1</sub> = 0.0357                                                  |
| [ <i>I</i> > 2σ( <i>I</i> )]                  | <i>wR</i> <sub>2</sub> = 0.1267                                               | <i>wR</i> <sub>2</sub> = 0.1300                                                 | <i>wR</i> <sub>2</sub> = 0.0844                                                 |
| <i>S</i>                                      | 1.059                                                                         | 1.022                                                                           | 1.019                                                                           |
| $\Delta\rho_{\text{max}}$ (eÅ <sup>-3</sup> ) | 0.97                                                                          | 0.62                                                                            | 0.67                                                                            |
| $\Delta\rho_{\text{min}}$ (eÅ <sup>-3</sup> ) | -0.65                                                                         | -0.47                                                                           | -0.52                                                                           |

**Table S8** Selected bond distances (Å) and bond angles (°).

---

| <b>Ag<sub>3</sub>pz<sub>3</sub></b>                   |            |                           |            |
|-------------------------------------------------------|------------|---------------------------|------------|
| Ag(1)-N(1)                                            | 2.095(5)   | Ag(1)-N(6)                | 2.091(5)   |
| Ag(2)-N(2)                                            | 2.097(5)   | Ag(2)-N(3)                | 2.084(5)   |
| Ag(3)-N(4)                                            | 2.073(5)   | Ag(3)-N(5)                | 2.082(5)   |
| Ag(4)-N(10)                                           | 2.058(5)   | Ag(4)-N(15)               | 2.067(5)   |
| Ag(5)-N(11)                                           | 2.085(5)   | Ag(5)-N(12)               | 2.087(5)   |
| Ag(6)-N(13)                                           | 2.093(5)   | Ag(6)-N(14)               | 2.077(5)   |
| Ag(1)⋯Ag(3) <sup>#1</sup>                             | 3.0950(7)  | Ag(4)⋯Ag(6) <sup>#2</sup> | 3.1172(7)  |
| Ag(1)⋯O(1) <sup>#1</sup>                              | 3.0346(53) | Ag(1)⋯O(2) <sup>#1</sup>  | 3.0583(62) |
| Ag(2)⋯O(2) <sup>#1</sup>                              | 2.9467(58) | Ag(3)⋯O(2) <sup>#1</sup>  | 3.1832(67) |
| Ag(4)⋯O(10)                                           | 3.1947(69) | Ag(5)⋯O(10)               | 3.0791(71) |
| Ag(5)⋯O(9)                                            | 2.9765(53) | Ag(6)⋯O(10)               | 2.9633(71) |
| N(6)-Ag(1)-N(1)                                       | 177.41(18) | N(3)-Ag(2)-N(2)           | 173.7(2)   |
| N(4)-Ag(3)-N(5)                                       | 172.7(2)   | N(10)-Ag(4)-N(15)         | 174.4(2)   |
| N(11)-Ag(5)-<br>N(12)                                 | 176.1(2)   | N(14)-Ag(6)-N(13)         | 175.4(2)   |
| <sup>#1</sup> 1-x, 1-y, -z; <sup>#2</sup> -x, 2-y, -z |            |                           |            |

---

| <b>Ag<sub>3</sub>pz<sub>3</sub>·DBT</b> |            |                          |            |
|-----------------------------------------|------------|--------------------------|------------|
| Ag(1)-N(1)                              | 2.084(3)   | Ag(1)-N(6)               | 2.087(3)   |
| Ag(2)-N(2)                              | 2.104(3)   | Ag(2)-N(3)               | 2.082(3)   |
| Ag(3)-N(4)                              | 2.068(3)   | Ag(3)-N(5)               | 2.073(3)   |
| Ag(1)⋯S(1) <sup>#</sup>                 | 3.3752(11) | Ag(3)⋯S(1)               | 3.4064(11) |
| Ag(1)⋯C(28)                             | 3.3284(40) | Ag(2)⋯C(26)              | 3.3155(39) |
| Ag(2)⋯C(26) <sup>#</sup>                | 3.6627(41) | Ag(2)⋯C(25) <sup>#</sup> | 3.5113(39) |
| Ag(2)⋯C(25)                             | 3.2411(42) | Ag(3)⋯C(28)              | 3.2855(40) |
| N(1)-Ag(1)-N(6)                         | 175.42(11) | N(3)-Ag(2)-N(2)          | 177.15(11) |
| N(4)-Ag(3)-N(5)                         | 179.48(11) |                          |            |
| <sup>#</sup> x, 1.5-y, -0.5+z           |            |                          |            |

---

| <b>Ag<sub>3</sub>pz<sub>3</sub>·DMDBT</b> |            |                          |             |
|-------------------------------------------|------------|--------------------------|-------------|
| Ag(1)-N(1)                                | 2.081(6)   | Ag(1)-N(6)               | 2.075(6)    |
| Ag(2)-N(2)                                | 2.076(6)   | Ag(2)-N(3)               | 2.076(6)    |
| Ag(3)-N(4)                                | 2.076(6)   | Ag(3)-N(5)               | 2.076(6)    |
| Ag(1)⋯S(1)                                | 3.8077(21) | Ag(2)⋯S(1)               | 3.6251(21)  |
| Ag(1)⋯C(27)                               | 3.5101(70) | Ag(1)⋯C(22)              | 3.3629(74)  |
| Ag(2)⋯C(27) <sup>#</sup>                  | 3.4680(71) | Ag(2)⋯C(28) <sup>#</sup> | 3.5070(77)  |
| Ag(3)⋯C(31)                               | 3.5654(95) | Ag(3)⋯C(31) <sup>#</sup> | 3.4990(103) |
| N(6)-Ag(1)-N(1)                           | 177.9(2)   | N(3)-Ag(1)-N(2)          | 176.6(2)    |
| N(4)-Ag(3)-N(5)                           | 178.8(3)   |                          |             |
| <sup>#</sup> x, 0.5-y, 0.5+z              |            |                          |             |

---

| <b>(Ag<sub>3</sub>pz<sub>3</sub>)<sub>2</sub>·BT</b> |  |  |  |
|------------------------------------------------------|--|--|--|
|------------------------------------------------------|--|--|--|

---

|                            |            |                 |            |
|----------------------------|------------|-----------------|------------|
| Ag(1)-N(1)                 | 2.071(5)   | Ag(1)-N(6)      | 2.067(5)   |
| Ag(2)-N(2)                 | 2.068(5)   | Ag(2)-N(3)      | 2.076(6)   |
| Ag(3)-N(4)                 | 2.092(5)   | Ag(3)-N(5)      | 2.086(5)   |
| Ag(1)···Ag(2) <sup>#</sup> | 3.091(7)   | Ag(2)···C(23A)  | 3.468(273) |
| Ag(2)···C(24A)             | 3.400(311) | Ag(1)···C(25A)  | 3.467(263) |
| Ag(1)···C(26A)             | 3.481(274) | Ag(3)···C(28B)  | 3.534(228) |
| Ag(3)···C(27B)             | 3.395(170) | Ag(2)···C(23B)  | 3.390(221) |
| Ag(1)···C(25B)             | 3.153(225) | Ag(2)···S(1A)   | 3.468(273) |
| Ag(1)···C(28A)             | 3.322(329) | Ag(3)···C(26A)  | 3.482(321) |
| Ag(2)···S(1B)              | 3.326(175) | Ag(1)···C(28B)  | 3.412(240) |
| Ag(3)···C(25B)             | 3.701(218) | Ag(3)···C(24B)  | 3.717(221) |
| N(6)-Ag(1)-N(1)            | 175.9(2)   | N(2)-Ag(2)-N(3) | 177.3(2)   |
| N(5)-Ag(3)-N(4)            | 177.9(2)   |                 |            |

<sup>#</sup> 0.5-x, 0.5-y, 1-z

### **Cu<sub>3</sub>pz<sub>3</sub>**

|                             |            |                             |            |
|-----------------------------|------------|-----------------------------|------------|
| Cu(1)-N(1)                  | 1.858(4)   | Cu(1)-N(6)                  | 1.855(4)   |
| Cu(2)-N(2)                  | 1.870(5)   | Cu(2)-N(3)                  | 1.861(5)   |
| Cu(3)-N(4)                  | 1.850(5)   | Cu(3)-N(5)                  | 1.850(4)   |
| Cu(4)-N(10)                 | 1.854(4)   | Cu(4)-N(15)                 | 1.854(4)   |
| Cu(5)-N(11)                 | 1.861(4)   | Cu(5)-N(13)                 | 1.867(4)   |
| Cu(6)-N(13)                 | 1.862(4)   | Cu(6)-N(14)                 | 1.869(4)   |
| Cu(2)···Cu(3) <sup>#1</sup> | 3.0199(11) | Cu(4)···Cu(6) <sup>#2</sup> | 2.9349(10) |
| Cu(1)···O(1)                | 2.9699(53) | Cu(2)···O(2)                | 2.9529(79) |
| Cu(5)···O(9)                | 2.8145(78) | Cu(6)···O(10)               | 3.0976(53) |
| N(6)-Cu(1)-N(1)             | 176.5(2)   | N(3)-Cu(2)-N(2)             | 174.5(2)   |
| N(5)-Cu(3)-N(4)             | 173.4(2)   | N(15)-Cu(4)-N(10)           | 171.8(2)   |
| N(11)-Cu(5)-N(12)           | 175.6(2)   | N(13)-Cu(6)-N(14)           | 174.61(19) |

<sup>#1</sup> 1-x, 1-y, -z; <sup>#2</sup> -x, 1-y, -1-z

### **Cu<sub>3</sub>pz<sub>3</sub>·DBT**

|                            |            |                            |            |
|----------------------------|------------|----------------------------|------------|
| Cu(1)-N(1)                 | 1.861(4)   | Cu(1)-N(6)                 | 1.855(4)   |
| Cu(2)-N(2)                 | 1.859(4)   | Cu(2)-N(3)                 | 1.854(3)   |
| Cu(3)-N(4)                 | 1.854(4)   | Cu(3)-N(5)                 | 1.854(4)   |
| Cu(2)···S(1) <sup>#</sup>  | 3.2871(19) | Cu(3)···S(1)               | 3.5658(18) |
| Cu(1)···C(24)              | 3.5669(43) | Cu(1)···C(25)              | 3.5136(42) |
| Cu(1)···C(22) <sup>#</sup> | 3.5040(34) | Cu(1)···C(27) <sup>#</sup> | 3.4207(33) |
| Cu(2)···C(27)              | 3.5889(33) | Cu(2)···C(28)              | 3.5128(42) |
| Cu(3)···C(33) <sup>#</sup> | 3.4782(43) | N(6)-Cu(1)-N(1)            | 178.16(18) |
| N(3)-Cu(2)-N(2)            | 176.16(16) | N(5)-Cu(3)-N(4)            | 178.88(18) |

<sup>#</sup> x, 0.5-y, -0.5+z

### **Cu<sub>3</sub>pz<sub>3</sub>·DMDBT**

|            |          |            |          |
|------------|----------|------------|----------|
| Cu(1)-N(6) | 1.854(2) | Cu(1)-N(1) | 1.852(2) |
|------------|----------|------------|----------|



|                              |            |                            |            |
|------------------------------|------------|----------------------------|------------|
| Cu(2)-N(2)                   | 1.854(2)   | Cu(2)-N(3)                 | 1.854(3)   |
| Cu(3)-N(4)                   | 1.845(3)   | Cu(3)-N(5)                 | 1.851(3)   |
| Cu(1)···S(1)                 | 3.5872(10) | Cu(3)···S(1) <sup>#</sup>  | 3.9414(10) |
| Cu(1)···C(27) <sup>#</sup>   | 3.4863(32) | Cu(1)···C(28) <sup>#</sup> | 3.6231(29) |
| Cu(2)···C(24) <sup>#</sup>   | 3.5847(44) | Cu(2)···C(23)              | 3.4631(31) |
| Cu(3)···C(29)                | 3.3329(29) | N(1)-Cu(1)-N(6)            | 176.98(11) |
| N(2)-Cu(2)-N(3)              | 177.20(12) | N(4)-Cu(3)-N(5)            | 177.93(11) |
| <sup>#</sup> x, 0.5-y, 0.5+z |            |                            |            |
